# Supplementary material for: Synthesis, electronic properties and packing modes of conjugated systems based on 2,5-di(cyanovinyl)furan or thiophene and imino-perfluorophenyl moieties
Source: Royal Society of Chemistry journal article supplement (doi:10.1039/c2nj40745k), 2012-10-24
Supplement: c2nj40745k.pdf [file c2nj40745k.pdf]

# Electronic Supplementary Information (ESI)

## Synthesis, electronic properties and packing modes of conjugated systems based on 2,5-di(cyanovinyl)furan or thiophene and imino-perfluorophenyl moieties

*Chady Moussallem, Magali Allain, Frédéric Gohier and Pierre Frère*

LUNAM Université, Université d'Angers, MOLTECH-Anjou CNRS UMR 6200, SCL Group, 2 Boulevard Lavoisier, 49045 Angers Cedex, France

|                                                                                                 |             |
|-------------------------------------------------------------------------------------------------|-------------|
| <b>Fig. S1</b> Cyclic voltammogram of 1 and 2                                                   | Page 2      |
| <b>Fig. S2</b> UV-Vis spectra of 1 and 2                                                        | Page 3      |
| <b>NMR Spectra</b>                                                                              |             |
| Copies of <sup>1</sup> H, <sup>13</sup> C and <sup>19</sup> F NMR spectra of compounds <b>1</b> | Pages 4 - 6 |
| Copies of <sup>1</sup> H, <sup>13</sup> C and <sup>19</sup> F NMR spectra of compounds <b>2</b> | Pages 7 - 9 |
| <b>Computational data</b>                                                                       |             |
| Atomic Coordinates of compounds <b>1</b>                                                        | Page 10     |
| Atomic Coordinates of compounds <b>2</b>                                                        | Page 11     |

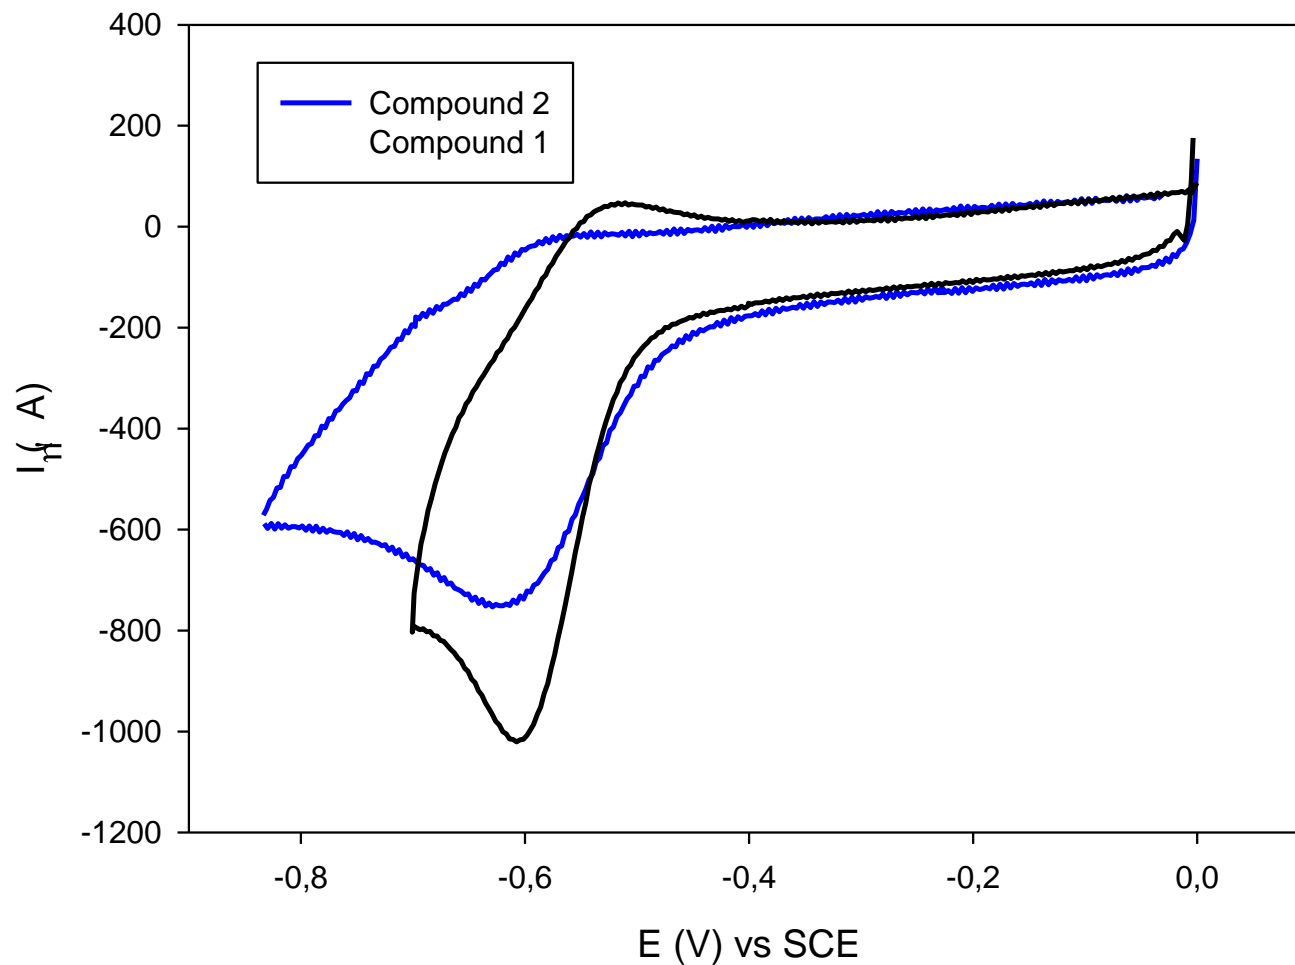

**Fig. S1** : CV of compounds **1** and **2** at  $2 \cdot 10^{-5} \text{ mol L}^{-1}$  in  $0.1 \text{ M Bu}_4\text{NPF}_6 / \text{CH}_2\text{Cl}_2$ , scan rate  $100 \text{ mVs}^{-1}$

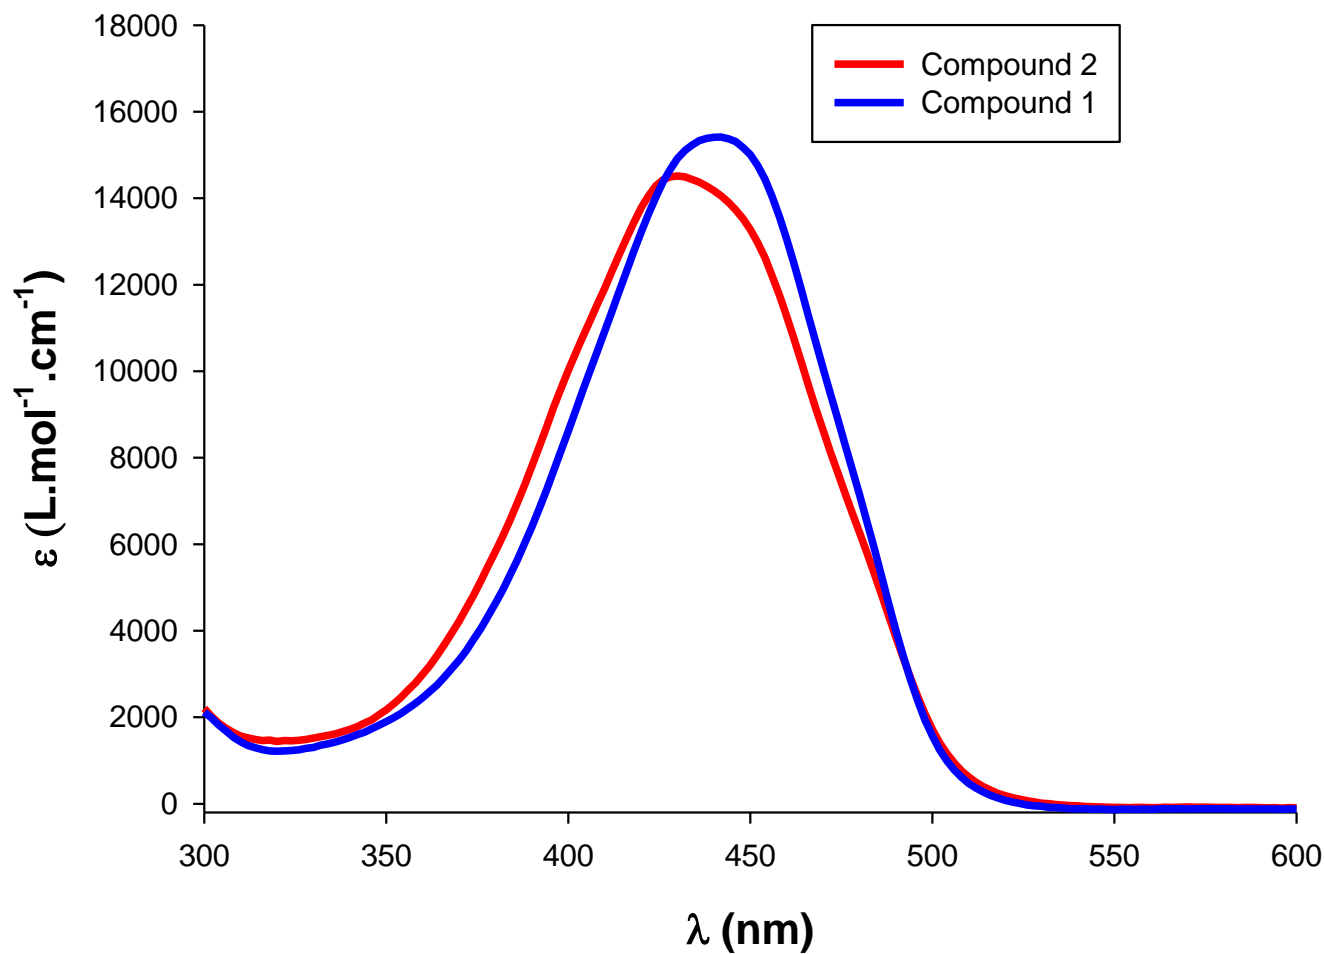

**Fig. S2** : UV-Vis absorption spectra of compounds **1** and **2** at  $10^{-5}$  mol L<sup>-1</sup> in CH<sub>2</sub>Cl<sub>2</sub>

$^1\text{H}$  NMR in  $(\text{CD}_3)_2\text{CO}$

8.761  
8.515  
8.174

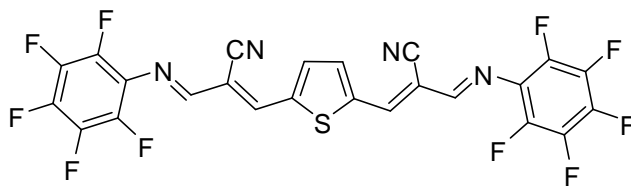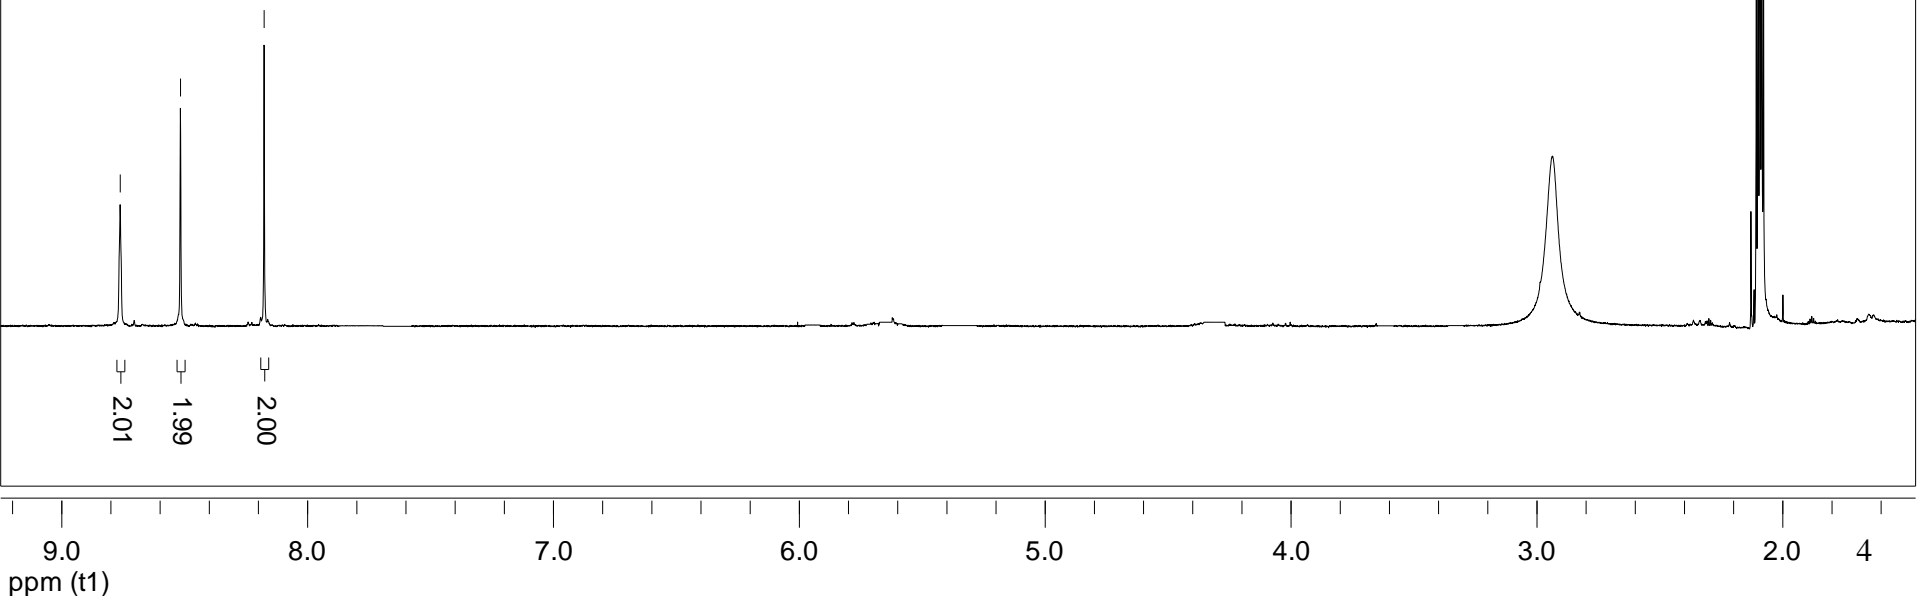

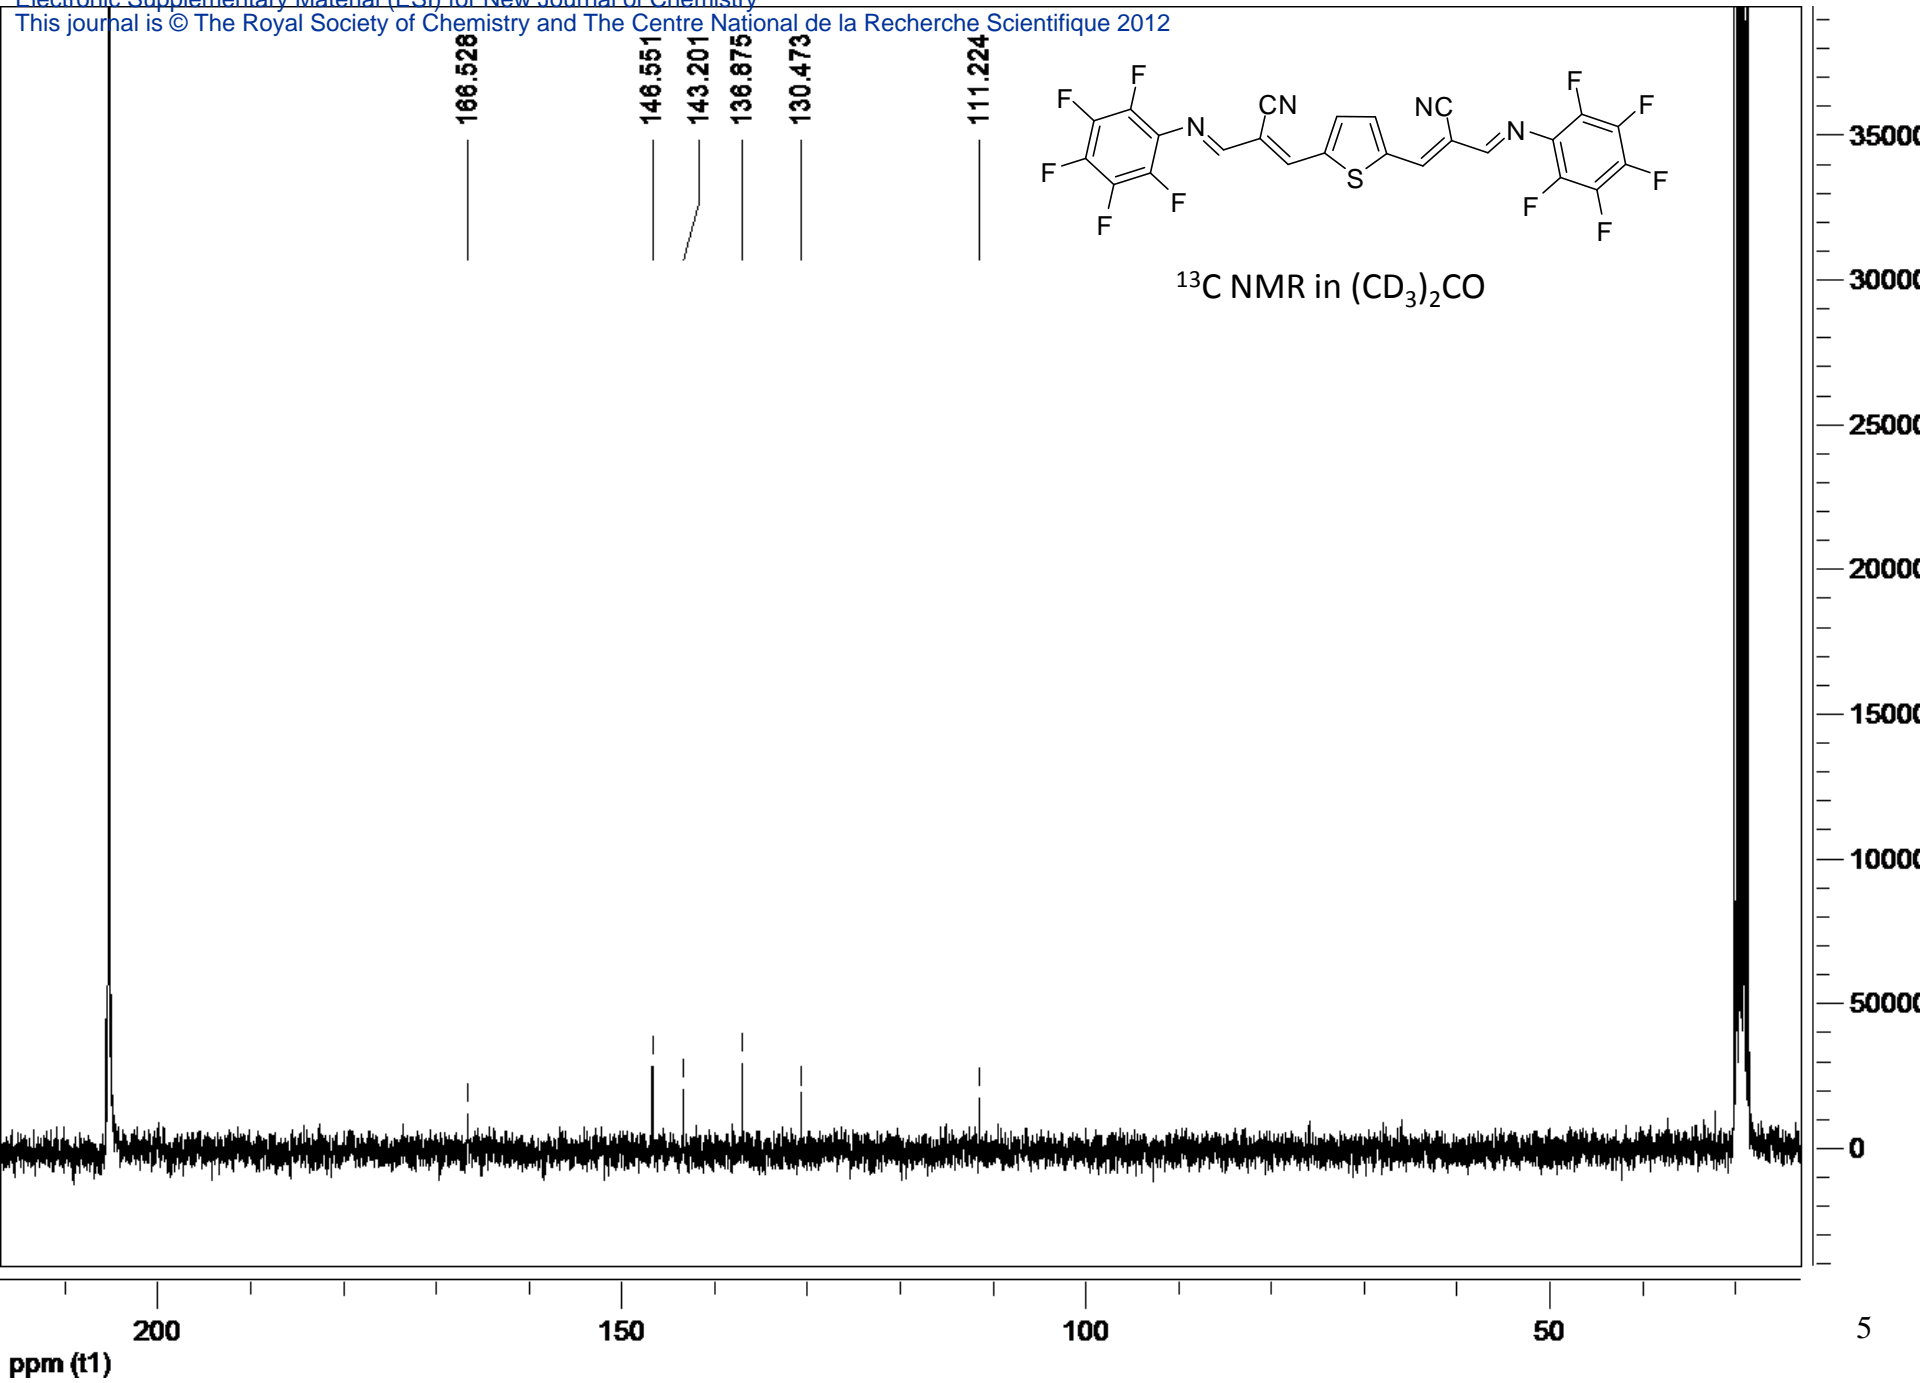

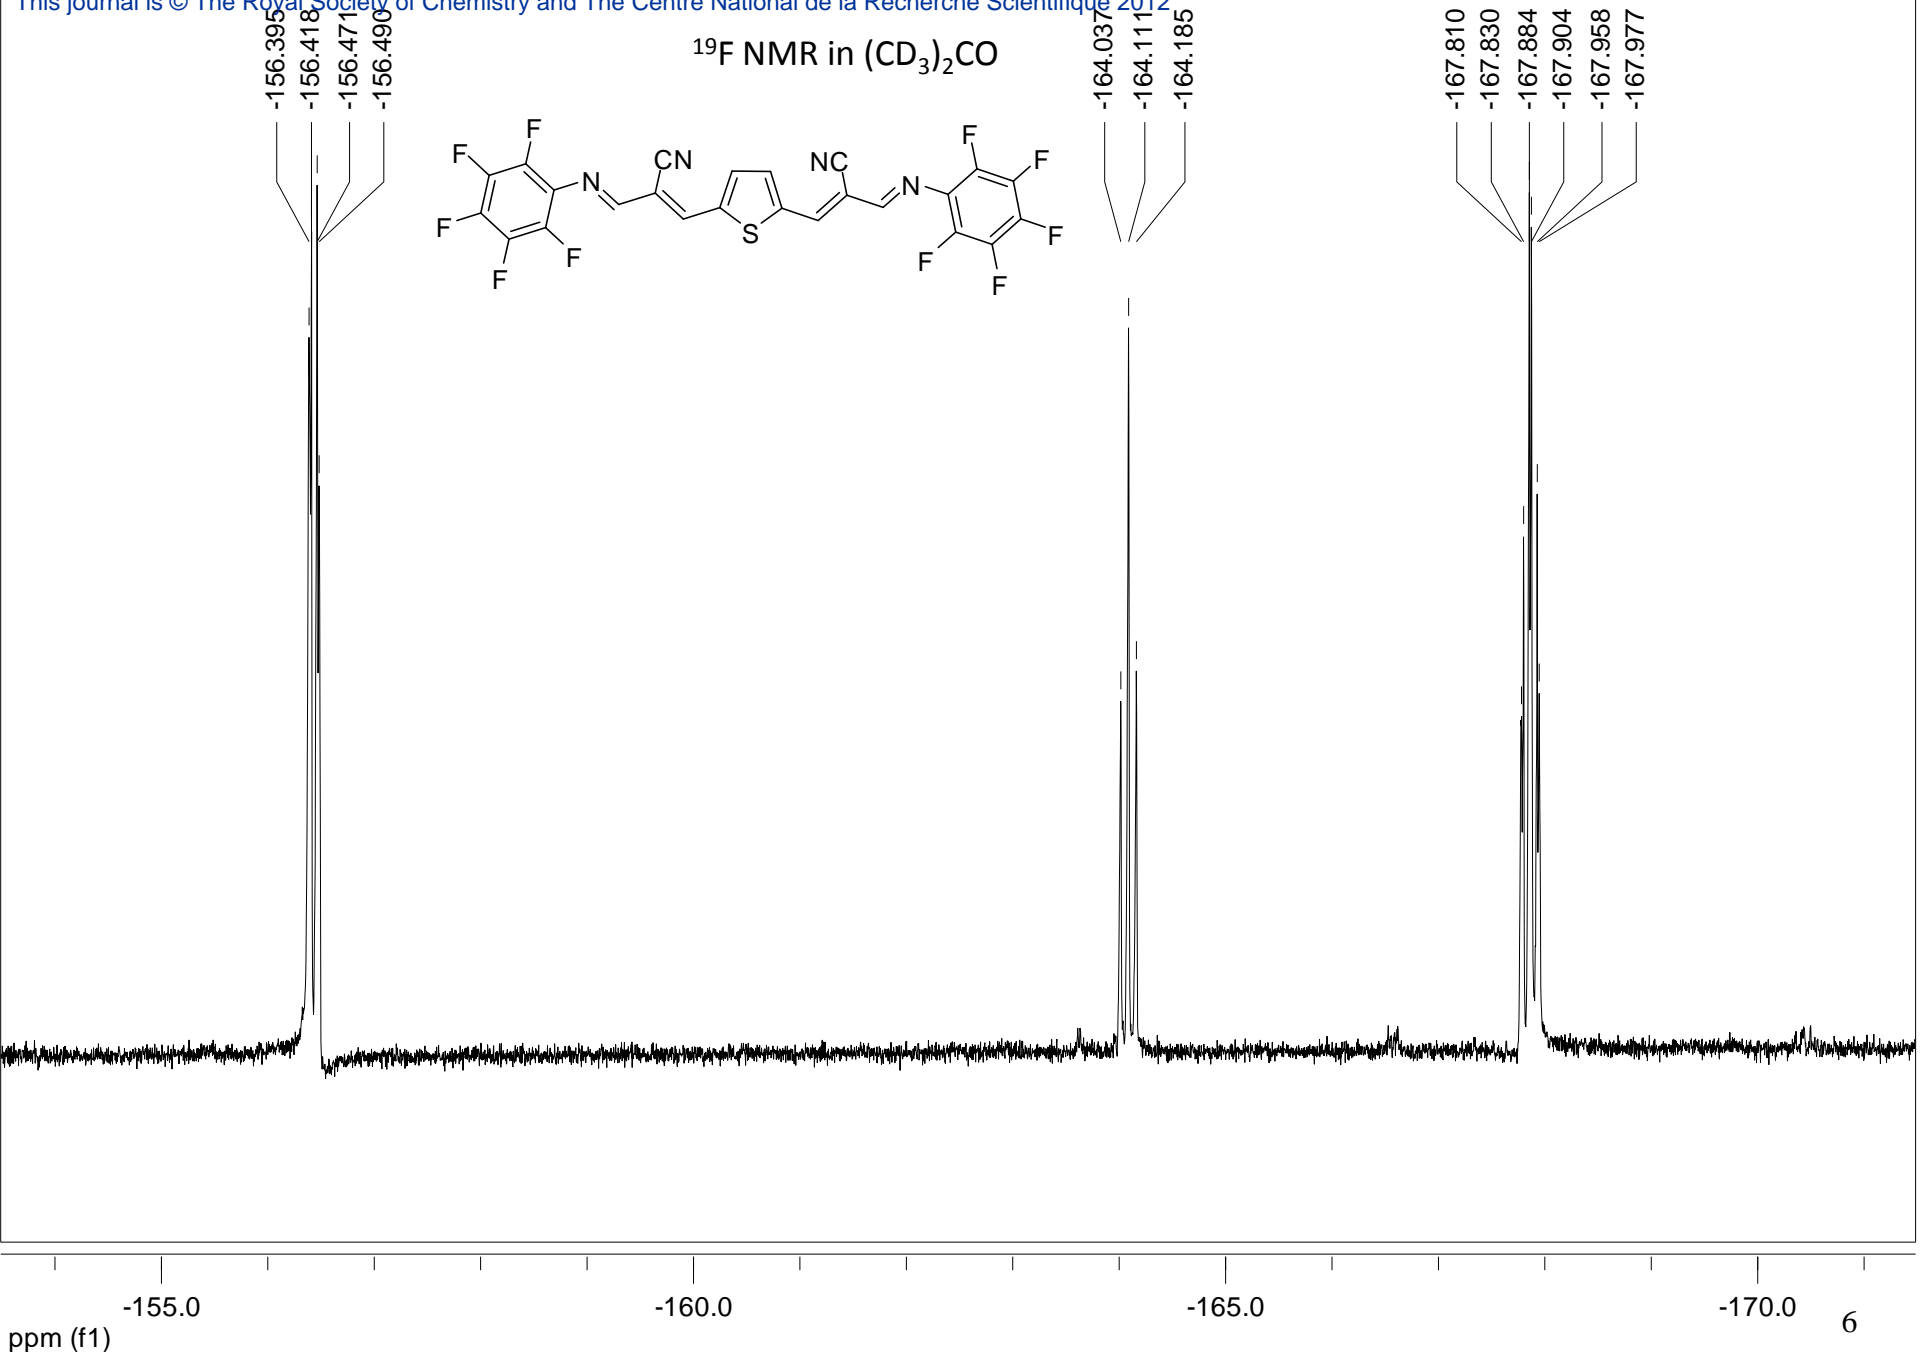

$^1\text{H}$  NMR in  $(\text{CD}_3)_2\text{CO}$

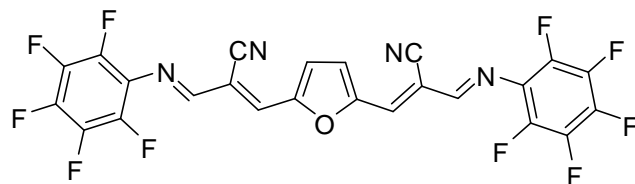

8.798

8.151

7.834

2.050

2.00

2.01

2.06

ppm (t1)

9.0

7.0

6.0

5.0

4.0

3.0

2.0

1.0

7

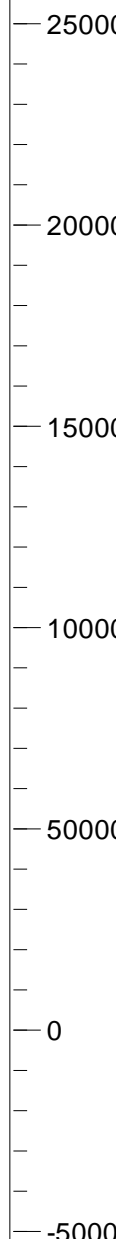

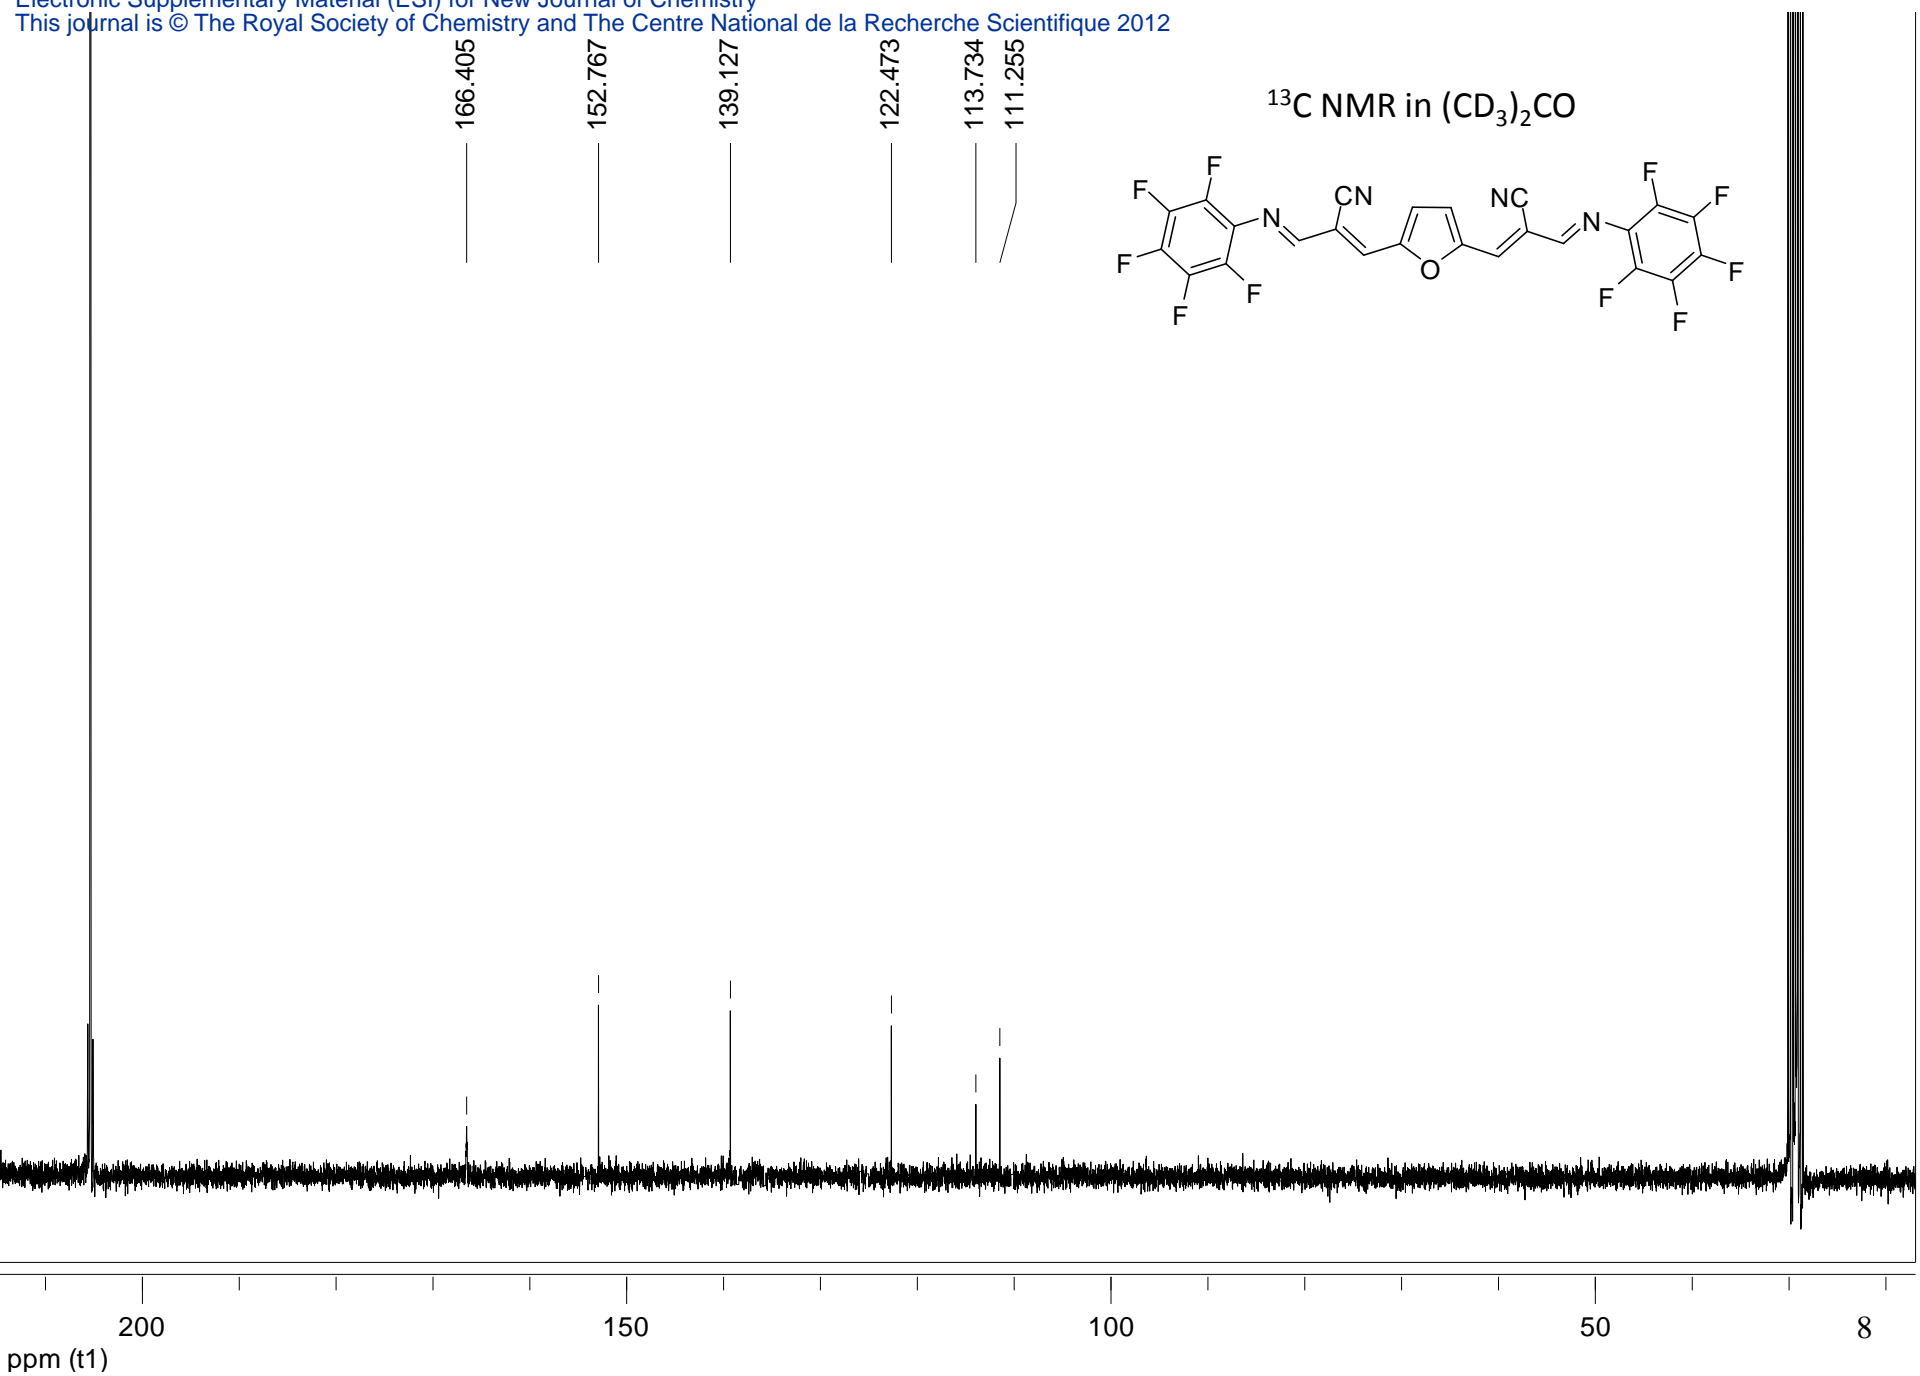

ppm (t1) 200 150 100 50 8



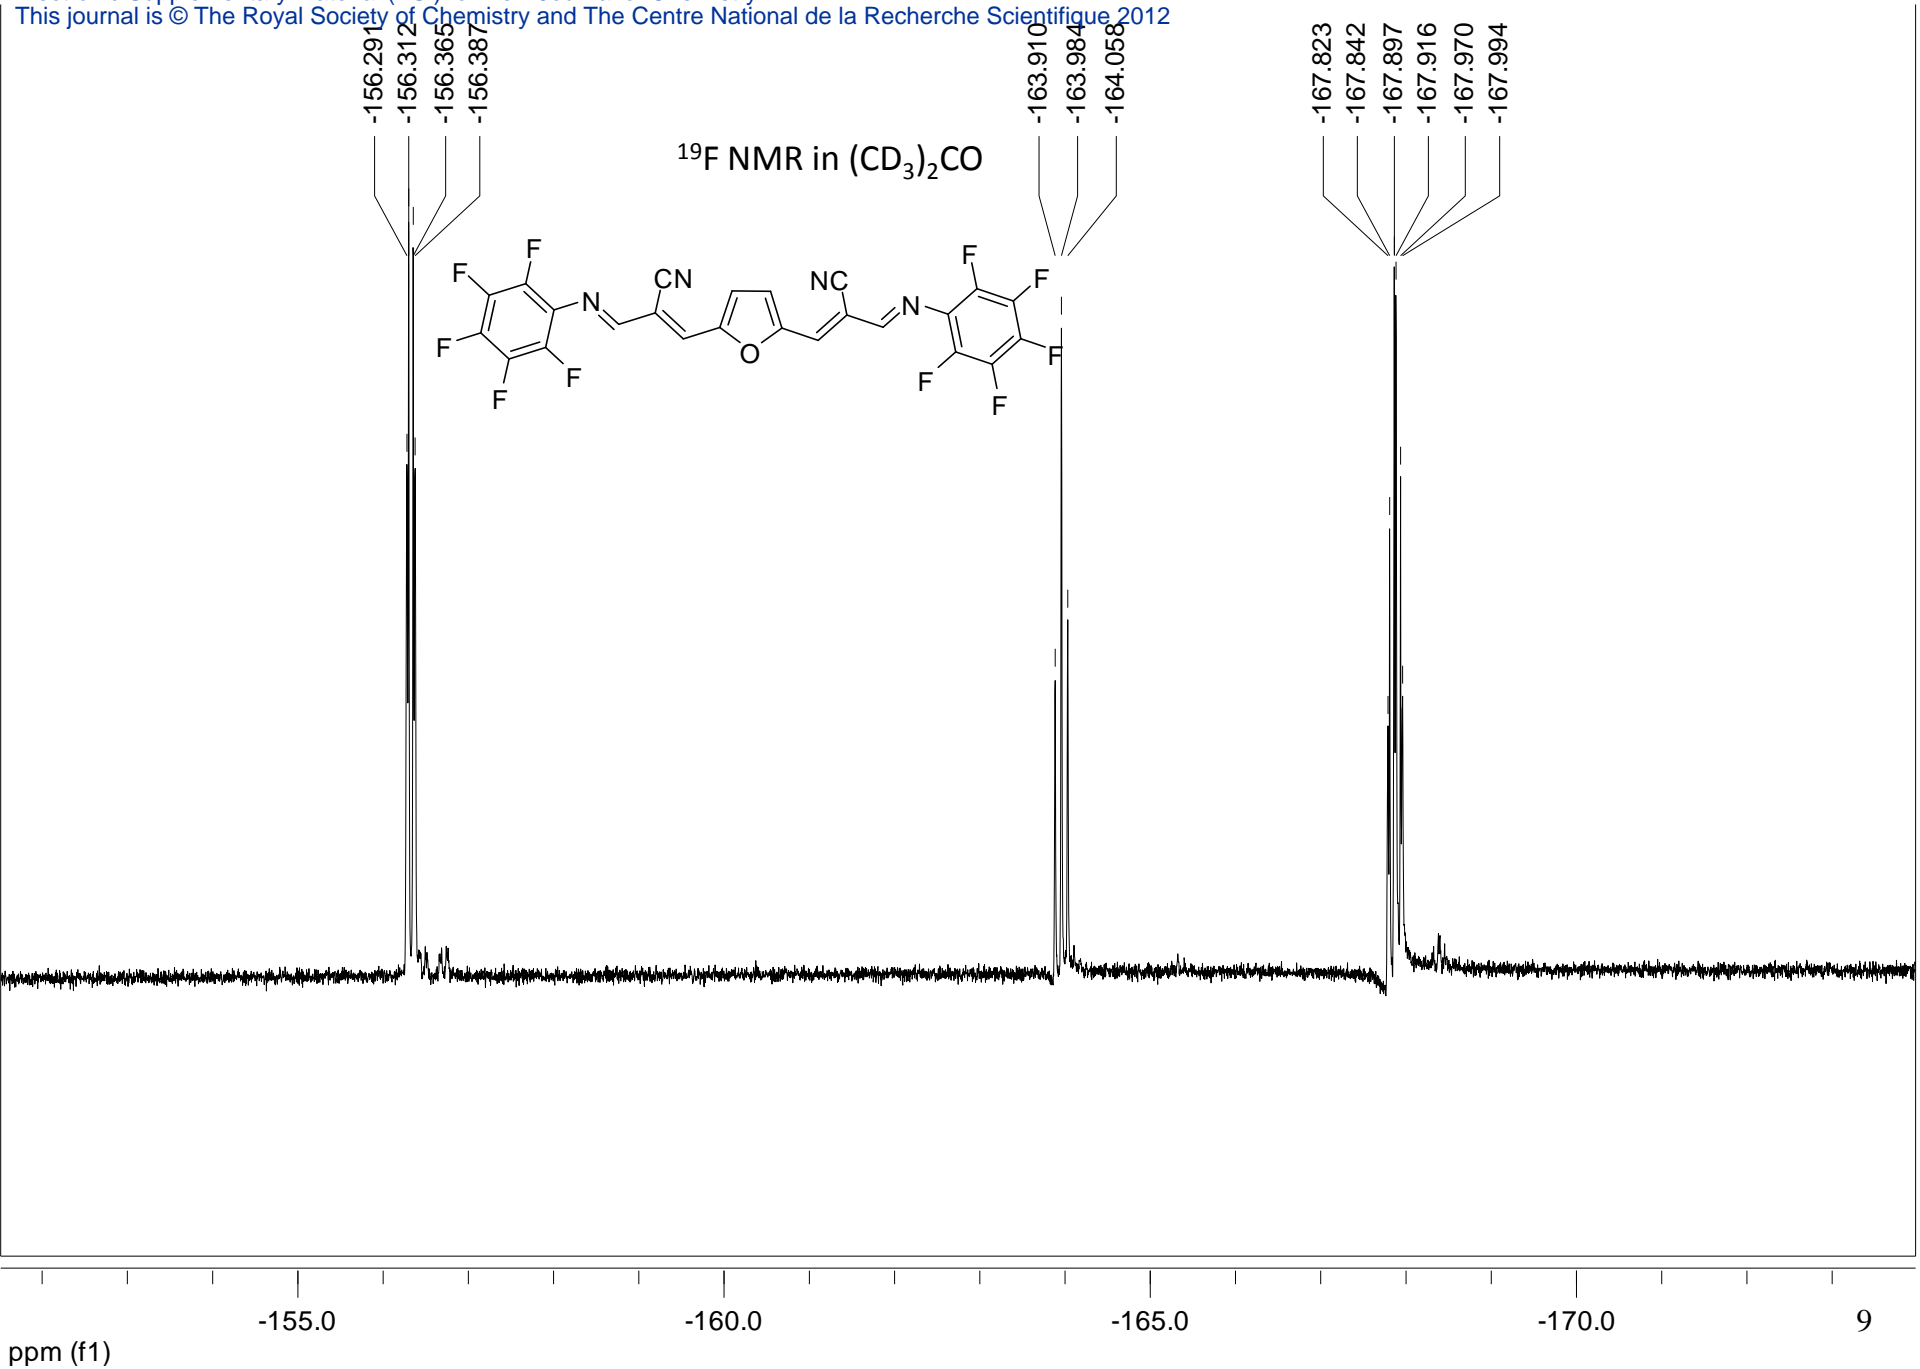

## Computational data

Theoretical calculations were performed at the *ab initio* density functional level with the Gaussian 09 package. Becke's three-parameter gradient-corrected functional (B3LYP) with a polarized 6-31G (d,p) basis was used for full geometry optimization of compounds **1** and **2**.

**Table S1:** Atom Coordinates of **1**

| Row | Symbol | X          | Y          | Z          | Row | Symbol | X           | Y          | Z          |
|-----|--------|------------|------------|------------|-----|--------|-------------|------------|------------|
| 1   | C      | 1.2599020  | 0.3800430  | -0.0070910 | 31  | H      | -4.9971170  | -1.1239340 | 0.0325460  |
| 2   | C      | 0.6991920  | 1.6555020  | -0.0042640 | 32  | N      | -6.1606940  | 0.6205330  | 0.0488100  |
| 3   | C      | -0.6992630 | 1.6555280  | 0.0036940  | 33  | C      | -7.4057540  | 0.0055690  | 0.0168070  |
| 4   | C      | -1.2600160 | 0.3800850  | 0.0068520  | 34  | C      | -7.7198880  | -1.1993560 | -0.6356750 |
| 5   | S      | -0.0000880 | -0.8309330 | 0.0001300  | 35  | C      | -8.4784920  | 0.6995990  | 0.6065360  |
| 6   | C      | 2.6208060  | -0.0642190 | -0.0153220 | 36  | C      | -9.0166470  | -1.6869980 | -0.6971690 |
| 7   | C      | 3.7792620  | 0.6625300  | -0.0218790 | 37  | C      | -9.7760150  | 0.2098330  | 0.5701950  |
| 8   | C      | 3.7961520  | 2.0898960  | -0.0162850 | 38  | C      | -10.0493800 | -0.9848560 | -0.0865950 |
| 9   | N      | 3.7735260  | 3.2445660  | -0.0104660 | 39  | F      | -8.2523090  | 1.8500280  | 1.2368740  |
| 10  | C      | 5.0605290  | -0.0338700 | -0.0303280 | 40  | F      | -10.7672030 | 0.8829840  | 1.1591440  |
| 11  | N      | 6.1605830  | 0.6200890  | -0.0489510 | 41  | F      | -11.2949120 | -1.4573140 | -0.1286110 |
| 12  | C      | 7.4056890  | 0.0052960  | -0.0166760 | 42  | F      | -9.2764560  | -2.8303240 | -1.3382500 |
| 13  | C      | 8.4785620  | 0.7000110  | -0.6054170 | 43  | F      | -6.7569280  | -1.9014860 | -1.2591490 |
| 14  | C      | 9.7761680  | 0.2104710  | -0.5689310 | 44  | C      | -3.7961100  | 2.0901890  | 0.0152580  |
| 15  | C      | 10.0494900 | -0.9847020 | 0.0869920  | 45  | N      | -3.7733590  | 3.2448540  | 0.0087980  |
| 16  | C      | 9.0166400  | -1.6875450 | 0.6965690  |     |        |             |            |            |
| 17  | C      | 7.7198200  | -1.2000930 | 0.6349590  |     |        |             |            |            |
| 18  | F      | 6.7567600  | -1.9029450 | 1.2574680  |     |        |             |            |            |
| 19  | F      | 9.2764080  | -2.8313430 | 1.3368160  |     |        |             |            |            |
| 20  | F      | 11.2950920 | -1.4569480 | 0.1291550  |     |        |             |            |            |
| 21  | F      | 10.7674760 | 0.8843020  | -1.1568960 |     |        |             |            |            |
| 22  | F      | 8.2524520  | 1.8508960  | -1.2349020 |     |        |             |            |            |
| 23  | H      | 1.2909000  | 2.5587010  | -0.0079560 |     |        |             |            |            |
| 24  | H      | -1.2909410 | 2.5587480  | 0.0071250  |     |        |             |            |            |
| 25  | H      | 2.7570590  | -1.1424070 | -0.0163990 |     |        |             |            |            |
| 26  | H      | 4.9968820  | -1.1243320 | -0.0320890 |     |        |             |            |            |
| 27  | C      | -2.6209570 | -0.0640460 | 0.0152340  |     |        |             |            |            |
| 28  | H      | -2.7573300 | -1.1422200 | 0.0168220  |     |        |             |            |            |
| 29  | C      | -3.7793350 | 0.6628270  | 0.0214830  |     |        |             |            |            |
| 30  | C      | -5.0606700 | -0.0334580 | 0.0303330  |     |        |             |            |            |

**Table S2:** Atom Coordinates of 2

| Row | Symbol | X           | Y          | Z          | Row | Symbol | X          | Y          | Z          |
|-----|--------|-------------|------------|------------|-----|--------|------------|------------|------------|
| 1   | C      | -1.1058000  | 1.2752870  | 0.0064720  | 31  | N      | 5.9560830  | 0.6616730  | -0.0424210 |
| 2   | C      | -0.7014040  | 2.6028190  | 0.0043990  | 32  | C      | 7.0780280  | -0.1565010 | -0.0017990 |
| 3   | C      | 0.7014830   | 2.6028730  | -0.0041030 | 33  | C      | 7.1785720  | -1.3938570 | 0.6582620  |
| 4   | C      | 1.1059170   | 1.2753450  | -0.0063610 | 34  | C      | 8.2561260  | 0.3401410  | -0.5897190 |
| 5   | C      | -2.3500840  | 0.5853870  | 0.0129110  | 35  | C      | 8.3721930  | -2.0962710 | 0.7286110  |
| 6   | C      | -3.6159230  | 1.1005050  | 0.0214930  | 36  | C      | 9.4501750  | -0.3649080 | -0.5446540 |
| 7   | C      | -3.8566710  | 2.5076400  | 0.0219600  | 37  | C      | 9.5122720  | -1.5850420 | 0.1192910  |
| 8   | N      | -3.9970510  | 3.6540150  | 0.0212450  | 38  | F      | 8.2334780  | 1.5090350  | -1.2264050 |
| 9   | C      | -4.7614120  | 0.2007450  | 0.0241240  | 39  | F      | 10.5442040 | 0.1242840  | -1.1329610 |
| 10  | N      | -5.9559190  | 0.6613280  | 0.0423840  | 40  | F      | 10.6581720 | -2.2637110 | 0.1691040  |
| 11  | C      | -7.0779300  | -0.1567270 | 0.0016520  | 41  | F      | 8.4293520  | -3.2634100 | 1.3766620  |
| 12  | C      | -8.2561550  | 0.3404500  | 0.5889380  | 42  | F      | 6.1076500  | -1.9164650 | 1.2818360  |
| 13  | C      | -9.4503150  | -0.3643980 | 0.5439090  | 43  | C      | 3.8567310  | 2.5078740  | -0.0215730 |
| 14  | C      | -9.5124400  | -1.5849120 | -0.1193550 | 44  | N      | 3.9970240  | 3.6542580  | -0.0203190 |
| 15  | C      | -8.3722780  | -2.0966730 | -0.7280630 | 45  | O      | 0.0000970  | 0.4703840  | -0.0000300 |
| 16  | C      | -7.1785500  | -1.3944250 | -0.6577550 |     |        |            |            |            |
| 17  | F      | -6.1075870  | -1.9176030 | -1.2807960 |     |        |            |            |            |
| 18  | F      | -8.4294280  | -3.2641480 | -1.3754990 |     |        |            |            |            |
| 19  | F      | -10.6584530 | -2.2633740 | -0.1691350 |     |        |            |            |            |
| 20  | F      | -10.5444440 | 0.1253240  | 1.1315840  |     |        |            |            |            |
| 21  | F      | -8.2335170  | 1.5096890  | 1.2249750  |     |        |            |            |            |
| 22  | H      | -1.3511800  | 3.4621350  | 0.0083130  |     |        |            |            |            |
| 23  | H      | 1.3511620   | 3.4622550  | -0.0078640 |     |        |            |            |            |
| 24  | H      | -2.2583880  | -0.4964240 | 0.0096190  |     |        |            |            |            |
| 25  | H      | -4.5157330  | -0.8632870 | 0.0215460  |     |        |            |            |            |
| 26  | C      | 2.3502590   | 0.5855480  | -0.0129440 |     |        |            |            |            |
| 27  | H      | 2.2586700   | -0.4962750 | -0.0098820 |     |        |            |            |            |
| 28  | C      | 3.6160790   | 1.1007270  | -0.0214310 |     |        |            |            |            |
| 29  | C      | 4.7616060   | 0.2010460  | -0.0242740 |     |        |            |            |            |
| 30  | H      | 4.5160070   | -0.8630150 | -0.0219380 |     |        |            |            |            |
